# Supplementary material for: Functional exploration of copy number alterations in a Drosophila model of triple-negative breast cancer
Source: Dis Model Mech. 2024 Jul 3;17(7):dmm050191. doi: 10.1242/dmm.050191 (PMC11247506; doi:10.1242/dmm.050191)
Supplement: Supplementary information [file dmm-17-050191-s1.pdf]

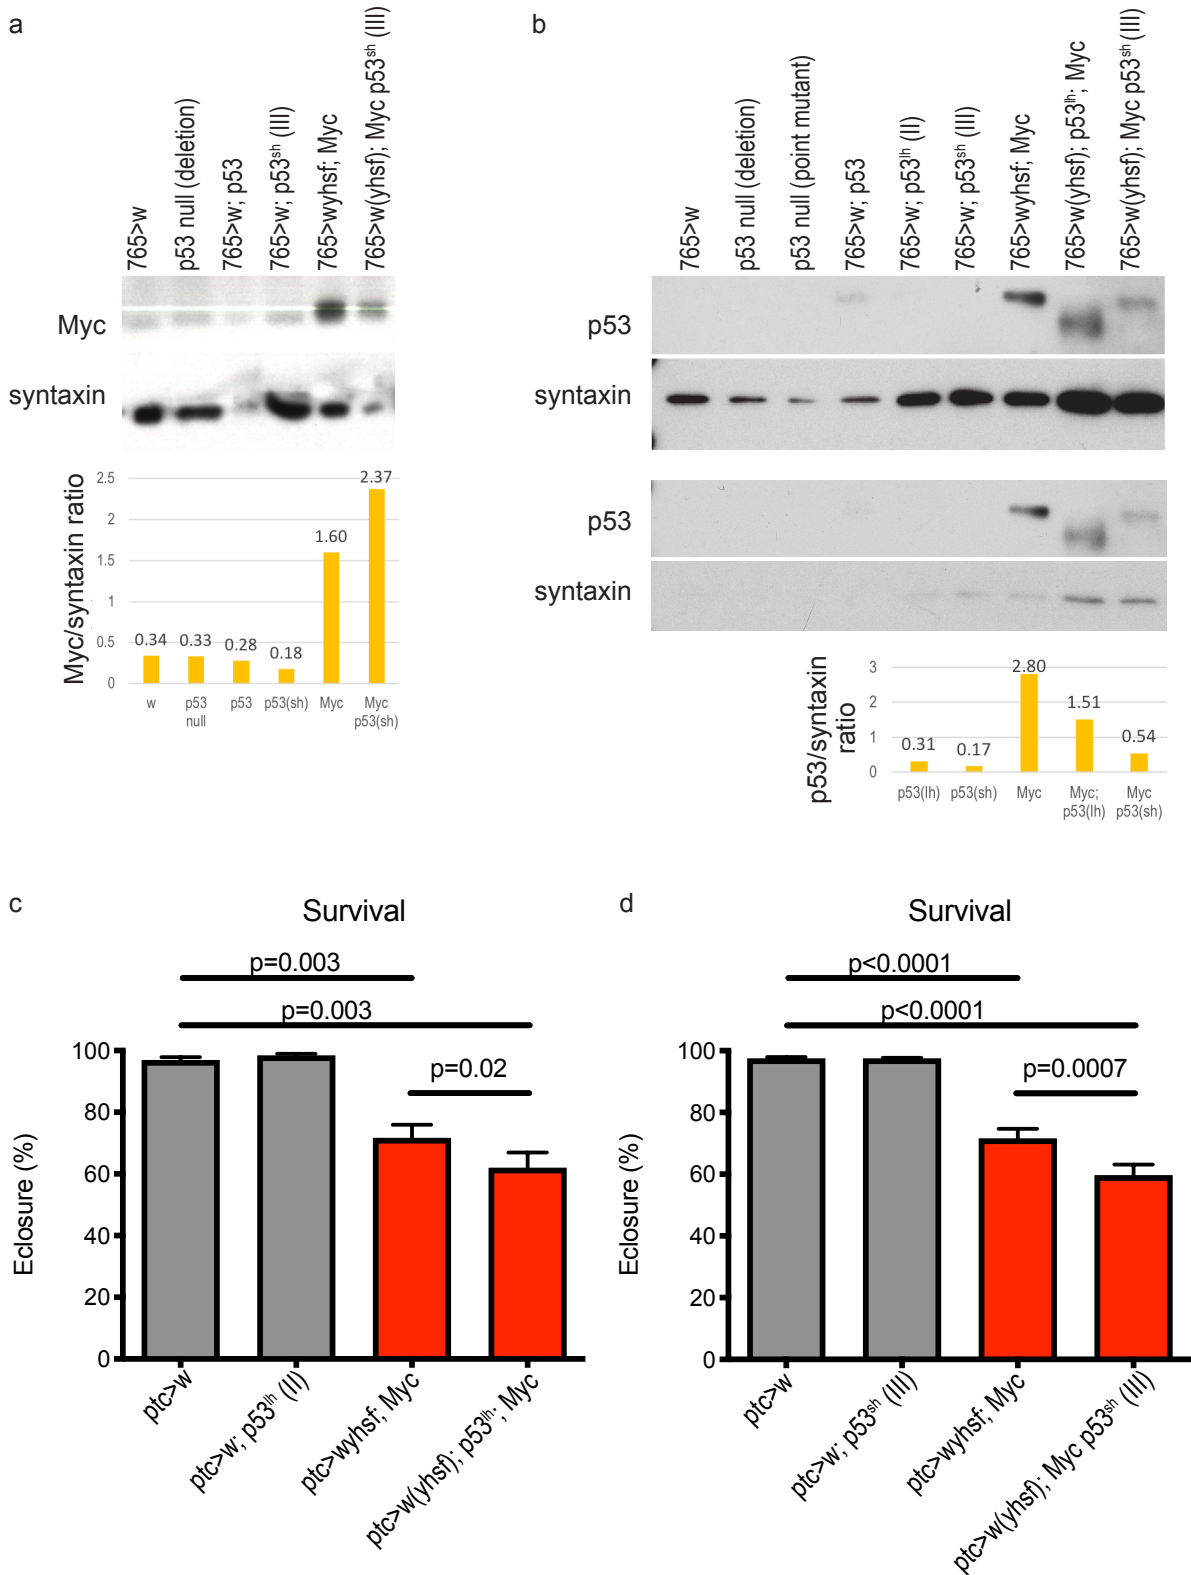

**Fig. S1. Myc and p53-RNAi synergize to impact survival in *Drosophila***

a) Western blot of Myc in fly wing discs with quantification below. b) Western blot of p53 in fly wing discs. Due to loading variability, two sets of exposures are shown for clarity. The lower set of exposures were used for quantification, below. See Materials and Methods section for discussion of the faster migrating P53 band. c) Survival of Myc-expressing flies when combined with  $p53^{lh}$ . d) Survival of Myc-expressing flies when combined with  $p53^{sh}$ . In c-d, Kruskal-Wallis test  $p < 0.0001$  and  $N = 11$ . P-values reflect Wilcoxon tests. *y* and *hs-flip* elements were present on the X chromosome where denoted. Related to Figure 1.

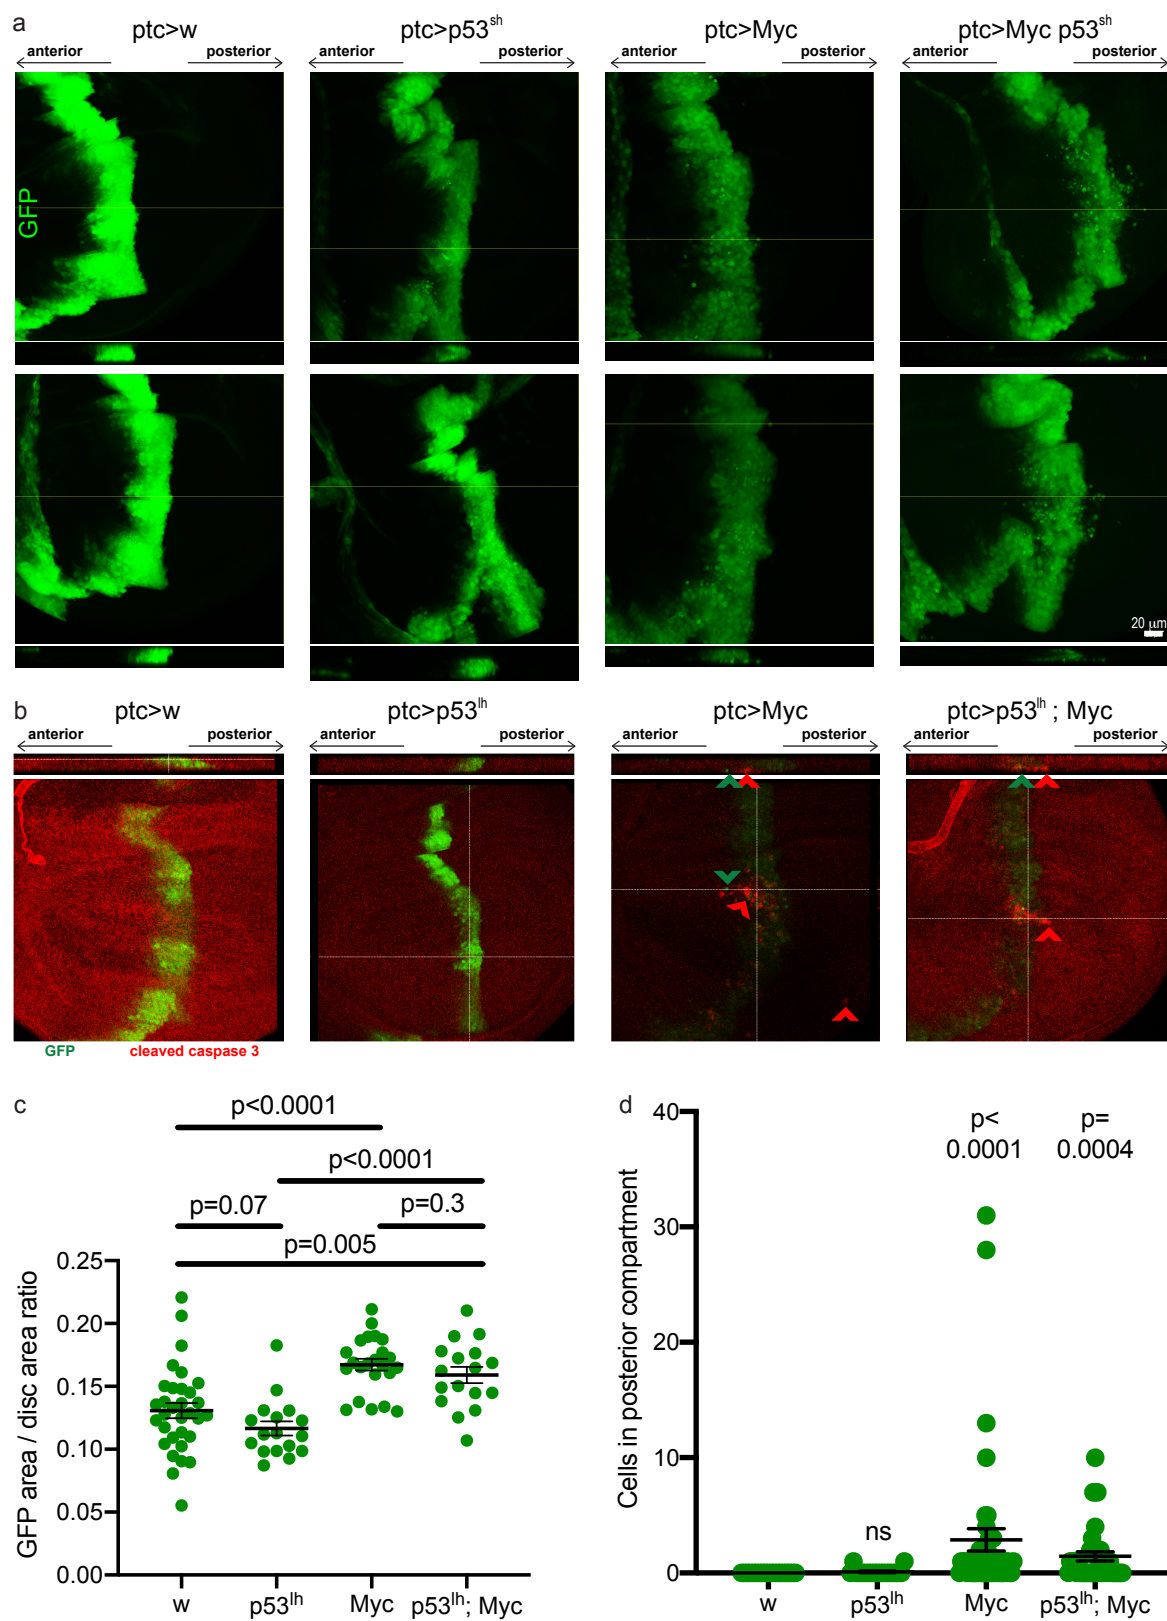

**Fig. S2. Overexpression of Myc induced tissue expansion and cell translocation in *Drosophila* wing discs**

Maximum projections (bottom) and z-stacks (top) of confocal stacks of the lower half of wing discs (a) showing tissue overgrowth and cell translocation for the same genotypes in Figure 2, and (b) wing discs stained with a cleaved-caspase antibody (red) for the same genotypes shown in Supplemental Figure 1c. Arrowheads mark delaminating or migrating cells; brightness and contrast were uniformly increased to improve visualization of staining. In (b), note  $p53^{lh}$  was used rather than  $p53^{sh}$  (Figure 2). Magnification: 40X. Anterior at left, posterior at right, apical at top, basal at bottom. c) Quantification of transgenic tissue overgrowth produced by combinations of *Myc* and  $p53^{lh}$  driven by *ptc-Gal4*. Kruskal-Wallis test:  $p < 0.0001$ . P-values reflect student's t tests. d) Quantification of cell translocation in transgenic tissue produced by combinations of *Myc* and  $p53^{lh}$  driven by *ptc-Gal4*. Kruskal-Wallis test:  $p < 0.0001$  P-values reflect Mann-Whitney tests compared to *w*. No significant difference was seen between *Myc* and  $p53^{lh}$ ; *Myc*. Related to Figure 2.

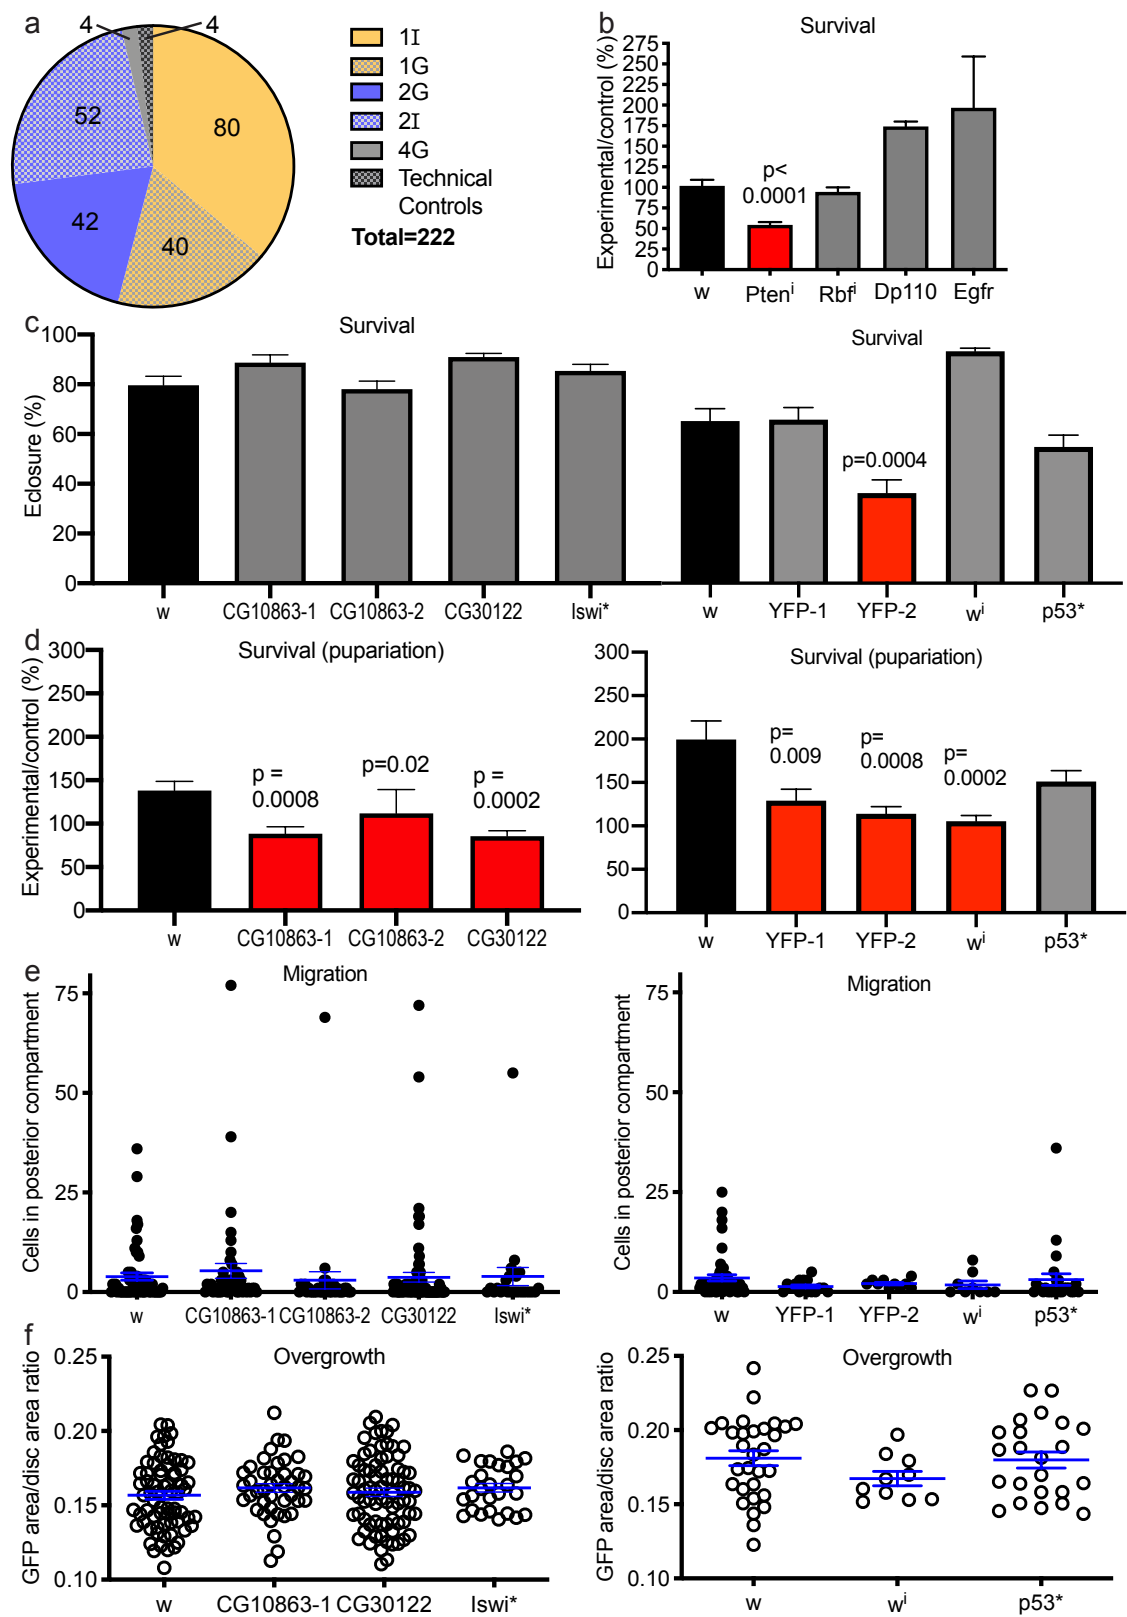

**Fig. S3. Characterization of positive and negative controls in three *Drosophila* assays**

a) Distribution of fly lines assessed in the screen among 6 computationally defined groups. b) Survival of flies to pupariation for positive controls (n=4 for EGFR, n=8 otherwise). c-d) Survival of flies to eclosion (c) and pupariation (d) for low priority genes (left panels: n=8 for CG10863-2 and *lswi*<sup>\*</sup>, n=24 for *w*, n=16 otherwise) and negative controls (right panels: n=8 for all). Pupariation could not be assessed in *lswi*<sup>\*</sup> because of a balancer. CG10863-1 and -2 are two lines for the same gene. The pupariation calculation is normalized by counts of internal control pupae and may be more sensitive to noise. e) Quantification of cell translocation in Group 4G (left) and control (right) lines. f) Quantification of overgrowth of transgenic tissue in Group 4G (left) and control (right) lines. Overgrowth could not be assessed in CG10863-2 because of a GFP tag, nor the YFP lines. All genotypes shown are in a background of *Myc,p53<sup>sh</sup>*. p-values reflect a student's t test where data are normally distributed, or a Mann-Whitney test otherwise, compared to *w*. Blue error bars indicate a non-significant difference. Related to Figure 3. See also Supplemental Table 4.

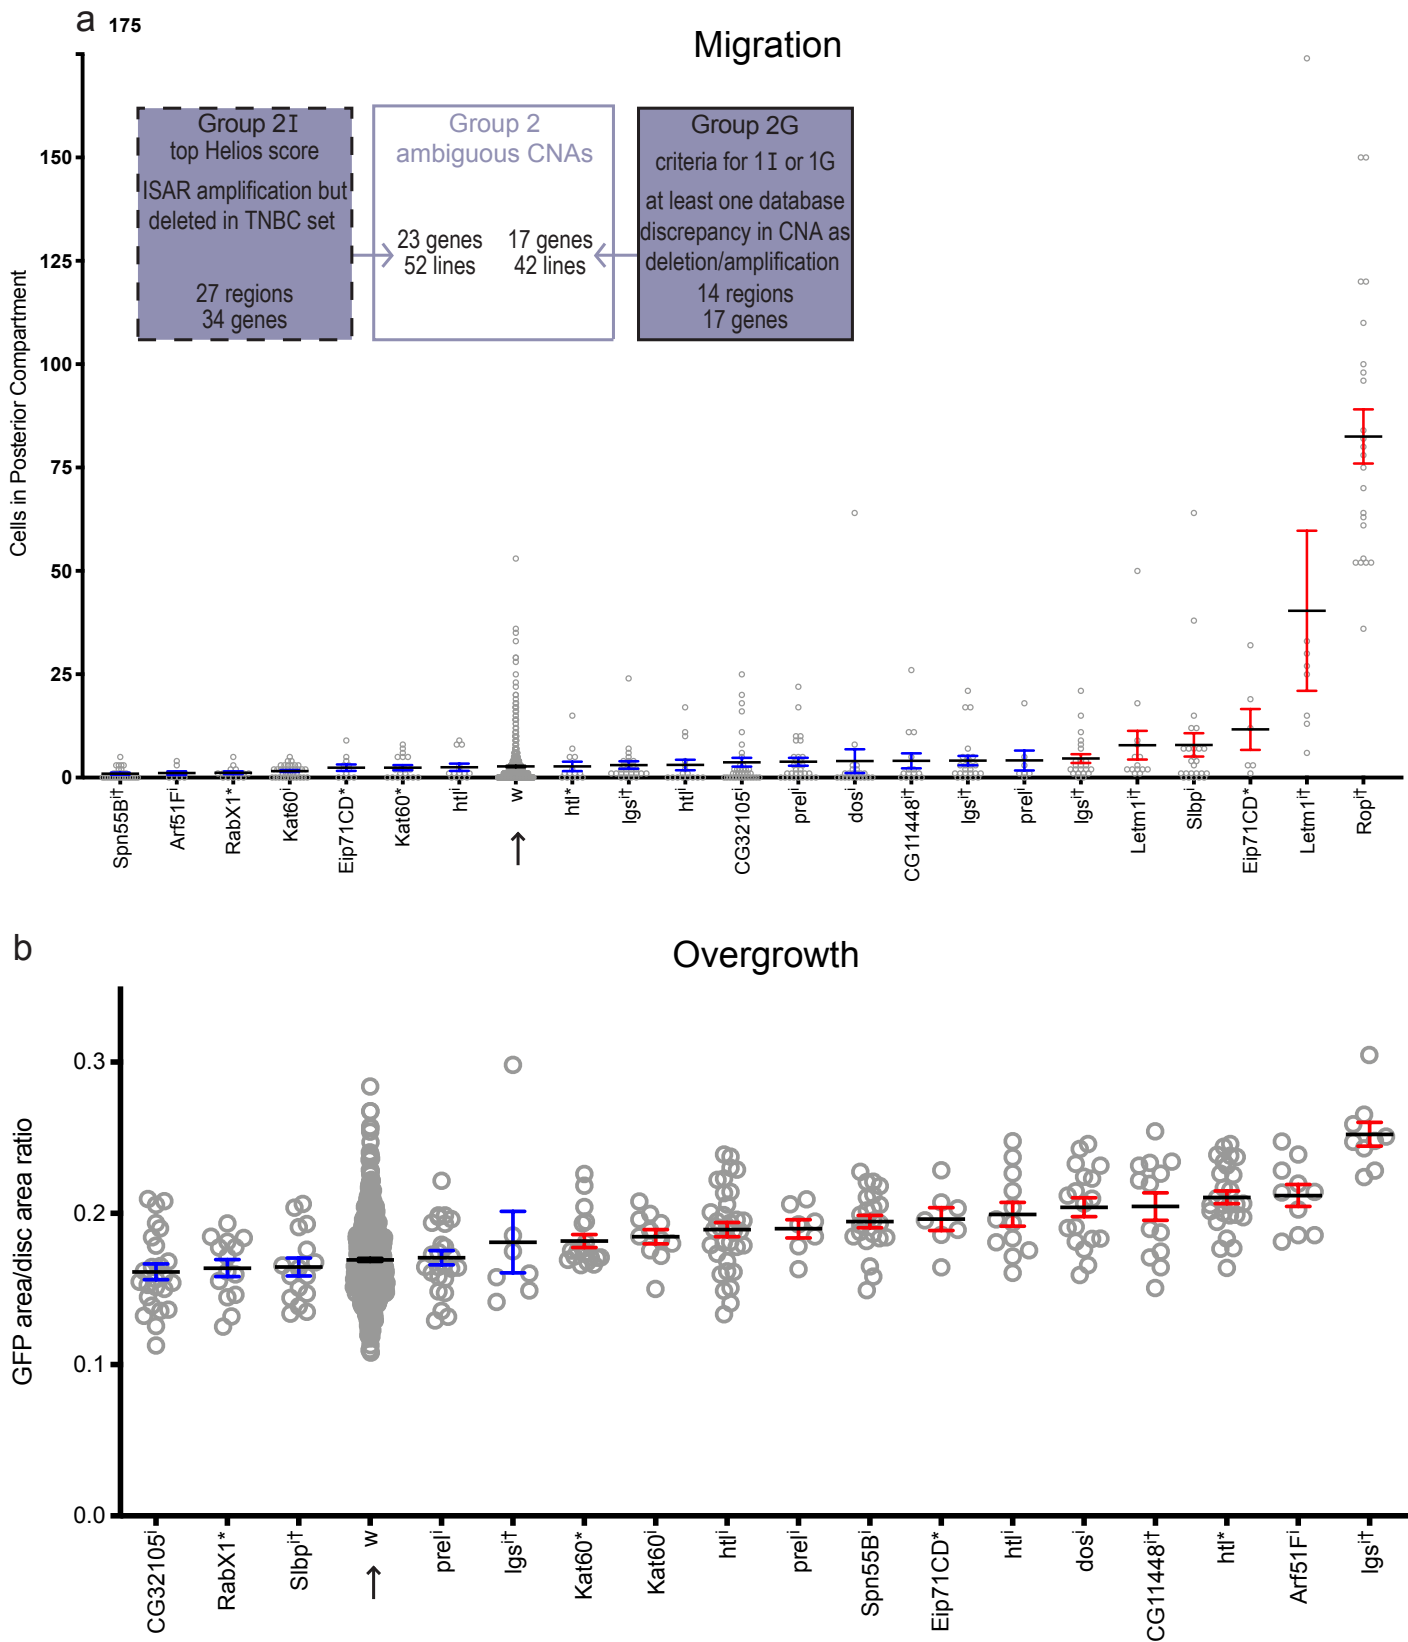

**Fig. S4. Some driver genes that appear in ambiguous CNAs produce tissue phenotypes in the background of *Myc* and *p53<sup>sh</sup>***

a) Quantification of cell translocation for genes from Group 2. Genes marked in red cause significant increase compared to *w* (arrow), measured as  $p < 0.05$  in the original experiment and false discovery rate (fdr)  $< 0.1$  in this aggregate analysis. b) Quantification of transgenic tissue overgrowth for genes from ambiguous deletions. Genes marked in red cause significant increase compared to *w* (arrow), measured as  $p < 0.05$  in the original experiment and fdr  $< 0.1$  in this aggregate analysis. Because of variation from one experiment to another, some genes that appear significant in this figure were not significant in their respective experiments. i indicates RNAi against the listed gene; \* indicates a heterozygous null allele. † indicates Group 2G; the rest are Group 2I (see Methods). Related to Figure 4.

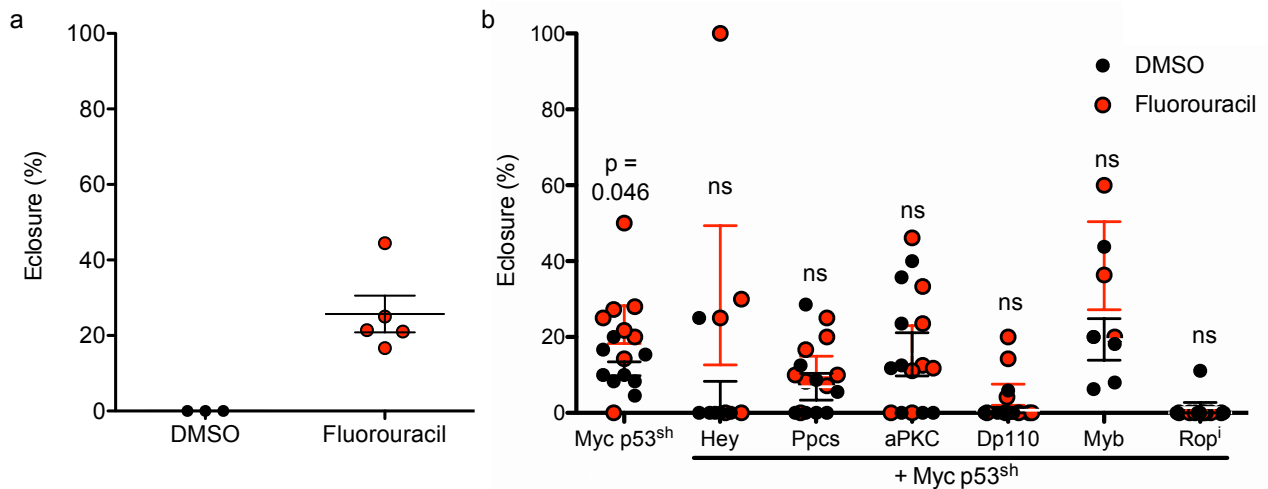

**Fig. S5. Genetic modifiers abrogate the survival response of  $p53^{sh}$  *Myc* to fluorouracil at 29 °C**

Fluorouracil was tested on the *ptc>Myc,p53<sup>sh</sup>* line at 29 °C (a) and *ptc>Myc,p53<sup>sh</sup>* plus six selected driver genes at 29 °C (b). In each case tested, addition of an additional driver led to loss of fluorouracil-mediated rescue. d) Fluorouracil was tested at two doses on *ptc>w*, *ptc>Myc,p53<sup>sh</sup>*, *ptc>Myc,p53<sup>sh</sup>*, *Myb*, and *ptc>Myc,p53<sup>sh</sup>,Dp110*, and transgenic tissue overgrowth was quantified as in Figure 4b. Two-way ANOVA results (b) were genotype:  $p < 0.0001$ , drug:  $p = 0.001$ , interaction: ns. Displayed p-values reflect t tests (see Methods). The final N for each condition is shown on each bar. Related to Figure 6.

| Gene     | Chr | Region                                          | CNV type | Percent Altered | t-test Result | CNV-RNA relationship | CNV type consistent with dataset | Fly gene | Lethality                                                                | Tissue                                                                                                                   | Other databases                                                                                                                                                                            | MutSigCV q-value | Survival analysis HR (p value) |
|----------|-----|-------------------------------------------------|----------|-----------------|---------------|----------------------|----------------------------------|----------|--------------------------------------------------------------------------|--------------------------------------------------------------------------------------------------------------------------|--------------------------------------------------------------------------------------------------------------------------------------------------------------------------------------------|------------------|--------------------------------|
| AKIRIN1  | 1   | ISAR 2                                          | amp      | 23.8            | *             | +                    | yes                              | akirin   | 1/1 overexpression line                                                  | 1/1 line enhanced cell migration                                                                                         | RPPA essential (7 clusters)                                                                                                                                                                |                  | PFI 2.02 (0.01)                |
| HEY1     |     | ISAR 3                                          | amp      | 23.8            | ns            | -                    | yes                              | Hey      | 1/1 overexpression lines                                                 | 1/1 line causes tumor                                                                                                    | RPPA essential (7 clusters)                                                                                                                                                                |                  | PFI 1.85 (0.02)                |
| PPCS     | 1   | ISAR 3                                          | amp      | 23.8            | *             | +                    | yes                              | Ppcs     | 2/3 overexpression lines                                                 | 1/1 line enhanced cell migration                                                                                         |                                                                                                                                                                                            |                  | PFI 1.91 (0.01)                |
| TM2D1    |     | ISAR 4                                          | amp      | 19.0            | ns            | +                    | yes                              | amx      | 1/1 overexpression line and 1/1 duplication line                         | 1/1 line enhanced tissue overgrowth                                                                                      |                                                                                                                                                                                            |                  |                                |
| INADL    | 1   | ISAR 7, basal amp 1q22                          | amp      | 18.1            | ns            | +                    | yes                              | dit      | 1/2 overexpression lines                                                 | 1/1 line enhanced tissue overgrowth                                                                                      |                                                                                                                                                                                            |                  |                                |
| ADAM15   |     | ISAR 7, basal amp 1q22                          | amp      | 69.5            | *             | +                    | yes                              | Meltrin  | 1/3 overexpression lines                                                 | 1/2 lines enhanced migration, 1/1 line enhanced tissue overgrowth                                                        |                                                                                                                                                                                            |                  |                                |
| RBM34    | 2   | ISAR 10, total amp 1q44                         | amp      | 61.0            | *             | +                    | yes                              | Pabp2    | 0/1 overexpression line                                                  | 1/1 overexpression line enhanced tissue overgrowth, 1/1 HA-tagged line (and 0/1 non-tagged line) enhanced cell migration |                                                                                                                                                                                            |                  |                                |
| GRHL1    |     | ISAR 11, basal del 2p25.3, total del 2p25.1     | amp      | 24.8            | *             | +                    | yes                              | grh      | 1/1 overexpression line                                                  | 1/1 line enhanced cell migration and tissue overgrowth                                                                   |                                                                                                                                                                                            |                  | OS 1.58 (0.09)                 |
| KLF11    | 2   | ISAR 15, basal amp 3q26.32                      | amp      | 24.8            | *             | +                    | yes                              | cbt      | 2/2 overexpression lines                                                 | 1/1 line enhanced cell migration                                                                                         |                                                                                                                                                                                            |                  |                                |
| PRKCI    |     | ISAR 15, basal amp 3q26.32                      | amp      | 50.5            | *             | +                    | yes                              | aPKC     | 3/4 overexpression lines                                                 | 3/4 lines enhanced cell migration, 1/1 line enhanced tissue overgrowth                                                   |                                                                                                                                                                                            |                  |                                |
| TBL1XR1  | 3   | basal amp 3q26.32, total amp 3q26.32            | amp      | 47.6            | *             | +                    | yes                              | ebi      | 2/3 overexpression lines                                                 | 2/3 lines enhanced cell migration                                                                                        |                                                                                                                                                                                            | 2.09E-03         |                                |
| PIK3CA   |     | ISAR 16, basal amp 3q26.32, total amp 3q26.32   | amp      | 43.8            | *             | +                    | yes                              | Pi3K92E  | 3/3 overexpression lines                                                 | 2/2 lines enhanced cell migration, 2/2 lines enhanced tissue overgrowth                                                  | Cosmic, TCGA pan-cancer, Parsons et al, CIVIC                                                                                                                                              | 7.76E-14         |                                |
| SLBP     | 4   | ISAR 17, basal del 4p16.3                       | del      | 48.6            | *             | +                    | yes                              | Slbp     | 1/1 RNAi line                                                            | 1/1 line enhanced cell migration                                                                                         | Decreased expression essential, Heterozygous copy loss essential                                                                                                                           |                  |                                |
| LETM1    |     | ISAR 17, basal del 4p16.3                       | del      | 48.6            | *             | +                    | yes                              | Letm1    | 1/2 RNAi lines, 0/1 mutated line                                         | 2/2 lines enhanced cell migration                                                                                        |                                                                                                                                                                                            |                  |                                |
| GAB1     | 4   | ISAR 20                                         | del      | 36.2            | *             | +                    | no                               | dos      | 1/1 RNAi line, 0/2 disrupted lines                                       | 1/1 line enhanced tissue overgrowth                                                                                      |                                                                                                                                                                                            |                  |                                |
| TRIO     |     | ISAR 22                                         | amp      | 32.4            | *             | +                    | yes                              | trio     | 2/2 partial cDNA overexpression lines, 0/2 full cDNA overexpression line | 1/1 full cDNA overexpression line enhanced cell migration                                                                | Basal essential                                                                                                                                                                            |                  |                                |
| MIER3    | 5   | basal del 5q11.2, total del 5q11.2              | del      | 70.5            | *             | +                    | yes                              | CG1620   | 1/1 line (unconfirmed)                                                   | 1/1 line enhanced cell migration                                                                                         |                                                                                                                                                                                            |                  |                                |
| FGFR4    |     | ISAR 24                                         | del      | 44.8            | ns            | +                    | no                               | htl      | see FGFR1                                                                |                                                                                                                          |                                                                                                                                                                                            |                  |                                |
| DEK      | 5   | basal amp 6p22.3, total amp 6p23                | amp      | 40.0            | *             | +                    | yes                              | Dek      | 1/1 overexpression line                                                  | 1/1 line enhanced tissue overgrowth                                                                                      | Cosmic                                                                                                                                                                                     |                  |                                |
| E2F3     |     | basal amp 6p22.3                                | amp      | 41.9            | *             | +                    | yes                              | E2f      | 4/5 overexpression lines                                                 | 1/3 lines enhanced cell migration                                                                                        | RPPA essential (7 clusters), Basal essential, Increased expression essential                                                                                                               |                  |                                |
| SOX4     | 6   | ISAR 25, basal amp 6p21.1                       | amp      | 43.8            | *             | +                    | yes                              | Sox14    | 1/2 overexpression lines                                                 | 1/1 lines enhanced tissue overgrowth                                                                                     | Myc-SL                                                                                                                                                                                     |                  |                                |
| FOXP4    |     | ISAR 27, total del 6p14.3                       | amp      | 42.9            | *             | +                    | yes                              | FoxP     | 1/1 overexpression line                                                  | 1/1 line enhanced tissue overgrowth                                                                                      | Basal essential                                                                                                                                                                            |                  |                                |
| PTP4A1   | 6   | ISAR 28, basal amp 6q21                         | amp      | 26.7            | ns            | +                    | yes                              | PRL-1    | 1/2 overexpression lines                                                 | 1/1 line enhanced cell migration                                                                                         |                                                                                                                                                                                            |                  |                                |
| C6orf203 |     | ISAR 29, basal amp 6q23.3, basal del 6q25.3     | amp      | 31.4            | *             | +                    | yes                              | CG4884   | 1/1 overexpression line                                                  | 1/1 line enhanced tissue overgrowth                                                                                      |                                                                                                                                                                                            | OS 2.17 (0.0004) |                                |
| MYB*     | 7   | ISAR 29, basal amp 6q23.3, basal del 6q25.3     | amp      | 28.6            | ns            | -                    | yes                              | Myb      | 1/2 overexpression lines, 1/1 RNAi line, 0/2 mutated lines               | 1/1 RNAi line enhanced migration, 1/1 overexpression line enhanced tissue overgrowth                                     | Cosmic                                                                                                                                                                                     | 0.44991          | OS 1.66 (0.04)                 |
| EGFR     |     | ISAR 34, basal amp 7p11.2, total amp 7p11.2     | amp      | 22.9            | ns            | +                    | yes                              | Egfr     | 2/5 overexpression lines                                                 | 2/2 lines enhanced cell migration, 1/1 line enh tissue overgrowth                                                        | Cosmic, TCGA pan-cancer, Parsons et al, CIVIC, Neve subtype essential (basal A & B, HER2 essential, luminal), RPPA essential (7 clusters), Basal essential, Increased expression essential |                  |                                |
| AUTS2    | 7   | ISAR 35                                         | amp      | 16.2            | *             | +                    | yes                              | tay      | 2/2 overexpression lines                                                 | 1/1 line enhanced cell migration                                                                                         | Basal essential                                                                                                                                                                            |                  |                                |
| UBE3C    |     | ISAR 37                                         | amp      | 21.0            | *             | +                    | yes                              | CG3356   | 2/2 overexpression lines                                                 | 1/2 lines enhanced cell migration, 1/1 line enhanced tissue overgrowth                                                   |                                                                                                                                                                                            |                  |                                |
| DNAJB6   | 8   | ISAR 38                                         | del      | 22.9            | *             | +                    | yes                              | mri      | 1/2 overexpression lines                                                 | 1/1 line enhanced tissue overgrowth                                                                                      |                                                                                                                                                                                            |                  |                                |
| MSRA     |     | ISAR 38                                         | del      | 56.2            | *             | +                    | no                               | Eip71CD  | 2/3 disrupted lines                                                      | 1/2 disrupted lines enhanced cell migration                                                                              |                                                                                                                                                                                            | OS 1.51 (0.02)   |                                |
| LETM2    | 8   | basal amp 8p11.23, basal del 8p22               | del      | 29.5            | *             | +                    | yes                              | Letm1    | see LETM1                                                                |                                                                                                                          | Basal essential, Neve subtypes essential (basal A & B, HER2, luminal)                                                                                                                      |                  |                                |
| FGFR1    |     | ISAR 41                                         | amp      | 29.5            | *             | +                    | yes                              | htl      | 1/2 RNAi lines, 1/1 amorphic line                                        | 1/1 RNAi line and 1/1 amorphic line enhanced tissue overgrowth                                                           | Cosmic, TCGA pan-cancer, CIVIC, Aure et al, Basal essential, Increased expression essential                                                                                                |                  |                                |
| ANKRD46  | 9   | ISAR 41                                         | amp      | 72.4            | *             | +                    | yes                              | CG10809  | 2/2 overexpression lines                                                 | 2/2 lines enhanced tissue overgrowth, 0/3 lines enhanced cell migration                                                  | Increased expression essential                                                                                                                                                             | OS 1.40 (0.05)   |                                |
| GRHL2†   |     | ISAR 42                                         | amp      | 69.5            | *             | +                    | yes                              | grh      | see GRHL1                                                                |                                                                                                                          |                                                                                                                                                                                            | 0.45446          | OS 1.39 (0.06)                 |
| TRPS1    | 9   | ISAR 43, basal amp 8q24.21, total amp 8q24.21   | amp      | 61.9            | *             | +                    | yes                              | srp      | 3/4 overexpression lines                                                 | 1/2 lines enhanced migration                                                                                             | Myc-SL                                                                                                                                                                                     |                  | OS 1.47 (0.03)                 |
| MYC      |     | ISAR 43, basal amp 8q24.21, total amp 8q24.21   | amp      | 76.2            | *             | +                    | yes                              | dm       | see figure 1                                                             | see figure 2                                                                                                             | Cosmic, Parsons et al, RPPA essential (7 clusters)                                                                                                                                         |                  | OS 1.45 (0.04)                 |
| STXBP1   | 10  | ISAR 45, basal del 9q34.3                       | del      | 42.9            | *             | +                    | yes                              | Rop      | 1/1 RNAi line                                                            | 1/1 line enhanced cell migration                                                                                         |                                                                                                                                                                                            |                  |                                |
| PTEN     |     | basal del 10q23.31, total del 10q23.31          | del      | 34.3            | *             | +                    | yes                              | Pten     | 3/4 RNAi lines, 0/1 disrupted line                                       | 1/1 RNAi line enhanced cell migration and tissue overgrowth, 0/1 disrupted line                                          | Cosmic, TCGA pan-cancer, Parsons et al, CIVIC, Myc-SL                                                                                                                                      | 0                |                                |
| BCL9L    | 11  | ISAR 54, basal del 11q25                        | del      | 38.1            | *             | +                    | yes                              | lgs      | 3/3 RNAi lines                                                           | 1/2 lines enhanced cell migration, 1/1 lines enhanced tissue overgrowth                                                  |                                                                                                                                                                                            |                  |                                |
| ETV6     |     | basal amp 12p13.2, total del 12p13.2            | amp      | 22.9            | *             | +                    | yes                              | aop      | 2/2 overexpression lines                                                 | 1/1 line enhanced tissue overgrowth                                                                                      | Cosmic, TCGA pan-cancer                                                                                                                                                                    |                  |                                |
| RILPL2   | 12  | ISAR 59, basal del 12q24.31, total del 12q24.33 | del      | 31.4            | *             | +                    | yes                              | CG11448  | 2/2 RNAi lines                                                           | 1/1 line enhanced tissue overgrowth                                                                                      |                                                                                                                                                                                            |                  |                                |
| KATNAL1  |     | ISAR 61, total amp 13q12.3                      | del      | 42.9            | *             | +                    | no                               | Kat60    | 1/1 RNAi line, 1/1 disrupted line                                        | 1/1 disrupted line enhanced tissue overgrowth, 0/1 RNAi line                                                             |                                                                                                                                                                                            |                  |                                |
| RB1      | 13  | basal del 13q14.2, total del 13q14              | del      | 42.9            | *             | +                    | yes                              | Rbf      | 1/1 RNAi line, 0/1 amorphic allele line                                  | 1/1 line enhanced cell migration                                                                                         | Cosmic, TCGA pan-cancer, Parsons et al, Heterozygous copy loss essential                                                                                                                   |                  |                                |
| ARF6     |     | ISAR 64                                         | del      | 33.3            | *             | +                    | no                               | Arf51F   | 1/1 RNAi line, 0/2 disrupted lines                                       | 1/1 RNAi line enhanced tissue overgrowth                                                                                 | Basal essential                                                                                                                                                                            |                  |                                |
| CREBBP   | 16  | basal del 16p13.3                               | del      | 22.9            | *             | +                    | yes                              | nei      | 1/1 RNAi line                                                            | 1/1 line enhanced tissue overgrowth                                                                                      | Cosmic, Vogelstein et al                                                                                                                                                                   |                  |                                |
| MAP2K4   |     | total del 17p12                                 | del      | 52.4            | *             | +                    | yes                              | Mkk4     | 2/4 RNAi lines                                                           | 1/3 lines enhanced cell migration, 1/2 lines enhanced tissue overgrowth                                                  | Cosmic, TCGA pan-cancer, Vogelstein et al, Basal essential                                                                                                                                 |                  |                                |
| SERPINB8 | 18  | ISAR 76 basal del 18q23                         | del      | 38.1            | *             | +                    | yes                              | Spn55B   | 1/1 RNAi line                                                            | 1/1 line enhanced tissue overgrowth                                                                                      |                                                                                                                                                                                            | OS 1.48 (0.04)   |                                |
| CCNE1    |     | ISAR 76, basal amp 19q12, total amp 19q12       | amp      | 25.7            | *             | +                    | yes                              | CycE     | 4/6 overexpression lines                                                 | 1/3 lines enhanced cell migration, 1/2 lines enhanced tissue overgrowth                                                  | Cosmic, CIVIC                                                                                                                                                                              | 0                |                                |

**Table S1. Computational and functional information on each driver gene.** \* indicates that MYB copy number has a possible negative relationship with expression (Supplemental Table 3) and was tested as both an oncogene and tumor suppressor. † indicates that GRHL2 did not meet criteria for inclusion in the screen but was tested because it shares an ortholog with GRHL1. “t-test Result” refers to a Student’s t-test of the effect of copy number on gene expression (see Methods). Genes examined in relevant prior studies (experimental or computational) in breast cancer or other well-known cancer databases are included under “Other Studies”: Breast cancer “essential” genes (41), COSMIC (40), TCGA pan-cancer (28), Parsons et al. (75), CiVIC (42), Myc-synthetic lethal (Myc-SL) (46), Aure et al. (38), Vogelstein et al.(56), TNBC migration driver genes (47), TNBC tumor addiction genes (48), and driver genes in a mouse model of TNBC (49). MutSigCV q-value is shown only for genes with  $q < 0.1$ . Progression free interval (PFI) and overall survival (OS) p-values reflect a log-rank test for patients with the aberration vs. without. Only genes with  $p < 0.1$  are shown, all of which the Kaplan-Meier curve plot indicates poorer prognosis with the CNA (Figure 5B-C). See also Supplemental Tables 2, 6, and 7.

**Table S2. Results of MutSigCV analysis on TCGA breast cancer somatic mutation dataset.**

Available for download at

<https://journals.biologists.com/dmm/article-lookup/doi/10.1242/dmm.050191#supplementary-data>

**Table S3. Computational data on all considered GISTIC 2.0 and ISAR genes.**

Available for download at

<https://journals.biologists.com/dmm/article-lookup/doi/10.1242/dmm.050191#supplementary-data>

**Table S4. Fly lines and experimental data for tested genes in Group 4G and negative control genes.**

Available for download at

<https://journals.biologists.com/dmm/article-lookup/doi/10.1242/dmm.050191#supplementary-data>

**Table S5. Summary of results for all CNA regions considered in this analysis.** Regions in gray are not likely to be significant in TNBC, but may be relevant to other breast cancer subtypes; not all of these were studied to completion.

Available for download at

<https://journals.biologists.com/dmm/article-lookup/doi/10.1242/dmm.050191#supplementary-data>

**Table S6.** Data from other databases for all considered GISTIC 2.0 and ISAR genes.

Available for download at

<https://journals.biologists.com/dmm/article-lookup/doi/10.1242/dmm.050191#supplementary-data>

**Table S7.** Log-rank test hazard ratios (HR) and p-values for driver genes using the TCGA breast cancer dataset. PFI and OS are preferred by the authors of [39] and are the metrics shown in Figure 5. HR are reported as negative for deletions here, and this is corrected in Figure 5.

Available for download at

<https://journals.biologists.com/dmm/article-lookup/doi/10.1242/dmm.050191#supplementary-data>

**Table S8.** Drugs used in the drug screen.

Available for download at

<https://journals.biologists.com/dmm/article-lookup/doi/10.1242/dmm.050191#supplementary-data>

**Table S9. Fly stocks and results for Group 1 genes**

Results symbols: +:  $p < 0.05$ . ?:  $0.05 < p < 0.4$ . -:  $p > 0.4$  or rescues phenotype. Each symbol represents one experiment.

Available for download at

<https://journals.biologists.com/dmm/article-lookup/doi/10.1242/dmm.050191#supplementary-data>

**Table S10. Fly stocks and results for Group 2 genes**

Results symbols: +:  $p < 0.05$ . ?:  $0.05 < p < 0.4$ . -:  $p > 0.4$  or rescues phenotype. Each symbol represents one experiment.

Available for download at

<https://journals.biologists.com/dmm/article-lookup/doi/10.1242/dmm.050191#supplementary-data>

### Table S11. Genetic screen results

In the lethality column, only lines that were significant ( $p < 0.05$ ) in two independent tests are considered positive and reported in each numerator. In the validation column, 'enhance' refers to affecting an increase in the phenotype over *Myc,p53<sup>sh</sup>*. Lines were generally only tested for tissue overgrowth (called 'growth' in Supplemental Tables 9, 10) when negative for cell translocation; unless otherwise indicated, a test for tissue overgrowth implies a negative cell translocation test. 'Passenger' refers to genes lacking functional evidence for driver status in this study. ND = not done.

Available for download at  
<https://journals.biologists.com/dmm/article-lookup/doi/10.1242/dmm.050191#supplementary-data>

### Table S12. Cell translocation assay results

Stock numbers and statistical results corresponding to Figures 4a and S4a.

Available for download at  
<https://journals.biologists.com/dmm/article-lookup/doi/10.1242/dmm.050191#supplementary-data>

### Table S13. Overgrowth assay results

Stock numbers and statistical results corresponding to Figures 4b and S4b.

Available for download at  
<https://journals.biologists.com/dmm/article-lookup/doi/10.1242/dmm.050191#supplementary-data>
